# Supplementary material for: Children’s Stress in the Time of COVID-19: Relationships with School, Social and Recreational Experiences
Source: MDPI journal article supplement (doi:10.3390/educsci13070630), 2023-06-21
Supplement: s1 [file s1]

**Table S1: Means of Social, Educational, and Stress Measures by Sociodemographic Characteristics**

|                                            | Change in Children's Social and Recreational Activities |          | Change in Children's Relationships |          | School Resources |          | Fully Online Instruction <sup>a</sup> |          | Parental Stress |          | Child Stress |          |
|--------------------------------------------|---------------------------------------------------------|----------|------------------------------------|----------|------------------|----------|---------------------------------------|----------|-----------------|----------|--------------|----------|
|                                            | (Range 0-4)                                             |          | (Range 0-2)                        |          | (Range 0-12)     |          |                                       |          | (Range 0-40)    |          | (Range 0-40) |          |
|                                            | Mean (SD)                                               | <i>p</i> | Mean (SD)                          | <i>p</i> | Mean (SD)        | <i>p</i> | %                                     | <i>p</i> | Mean (SD)       | <i>p</i> | Mean (SD)    | <i>p</i> |
| n= 701                                     | 2.65 (1.16)                                             |          | 0.98 (0.67)                        |          | 5.84 (3.40)      |          | 41.08                                 |          | 18.38 (9.08)    |          | 16.16 (7.38) |          |
| Race/ethnicity                             |                                                         | 0.18     |                                    | 0.10     |                  | <0.001   |                                       | 0.03     |                 | <0.001   |              | 0.23     |
| Asian (2.0%)                               | 2.71 (0.83)                                             |          | 1.36 (0.63)                        |          | 6.21 (3.14)      |          | 71.43                                 |          | 10.79 (6.64)    |          | 13.21 (8.17) |          |
| Black or African American (9.1%)           | 2.55 (1.26)                                             |          | 1.02 (0.72)                        |          | 7.63 (3.63)      |          | 43.75                                 |          | 15.17 (9.16)    |          | 14.69 (6.73) |          |
| Hispanic, Latino, or Spanish Origin (4.4%) | 2.74 (1.32)                                             |          | 1.10 (0.79)                        |          | 5.61 (3.94)      |          | 61.29                                 |          | 18.90 (8.82)    |          | 17.42 (7.06) |          |
| Multiracial (7.3%)                         | 2.92 (1.21)                                             |          | 1.06 (0.70)                        |          | 5.02 (3.40)      |          | 43.14                                 |          | 19.10 (9.55)    |          | 16.82 (8.05) |          |
| White (76.2%)                              | 2.64 (1.13)                                             | ref      | 0.96 (0.66)                        | ref      | 5.72 (3.29)      | ref      | 38.76                                 | ref      | 18.76 (8.92)    | ref      | 16.22 (7.35) | ref      |
| Other/Prefer not to say (1.0%)             | 1.71 (1.70)                                             |          | 0.57 (0.79)                        |          | 5.29 (4.23)      |          | 28.57                                 |          | 25.86 (10.45)   |          | 20.29 (9.05) |          |
| Annual household income                    |                                                         | 0.36     |                                    | 0.27     |                  | 0.31     |                                       | 0.09     |                 | <0.001   |              | 0.13     |
| Less than \$25,000 (7.6%)                  | 2.83 (1.17)                                             |          | 1.15 (0.66)                        |          | 5.89 (3.80)      |          | 47.17                                 |          | 23.66 (9.50)    |          | 18.43 (7.74) |          |
| \$25,000 to \$34,999 (8.7%)                | 2.44 (1.37)                                             |          | 0.92 (0.78)                        |          | 5.54 (4.05)      |          | 45.90                                 |          | 20.05 (8.32)    |          | 16.61 (6.77) |          |
| \$35,000 to \$49,999 (11.8%)               | 2.75 (1.17)                                             |          | 1.05 (0.70)                        |          | 5.22 (3.57)      |          | 54.23                                 |          | 19.69 (8.90)    |          | 17.34 (7.78) |          |
| \$50,000 to \$74,999 (22.7%)               | 2.76 (1.15)                                             |          | 1.03 (0.69)                        |          | 5.91 (3.41)      |          | 38.99                                 |          | 19.86 (9.04)    |          | 16.39 (7.77) |          |
| \$75,000 to \$99,999 (18.3%)               | 2.56 (1.15)                                             |          | 0.94 (0.66)                        |          | 5.88 (3.28)      |          | 41.41                                 |          | 16.30 (9.11)    |          | 15.65 (7.33) |          |
| \$100,000 to \$149,999 (19.5%)             | 2.59 (1.12)                                             |          | 0.89 (0.63)                        |          | 6.40 (2.98)      |          | 35.77                                 |          | 15.23 (8.52)    |          | 14.82 (7.04) |          |
| \$150,000 or more (10.6%)                  | 2.54 (1.10)                                             | ref      | 0.97 (0.62)                        | ref      | 5.65 (3.25)      | ref      | 33.78                                 | ref      | 17.70 (7.85)    | ref      | 15.66 (6.64) | ref      |

|                                                                         | Change in<br>Children's<br>Social and<br>Recre-<br>ational<br>Activities | Change in<br>Children's<br>Relation-<br>ships | School<br>Resources   | Fully<br>Online<br>Instruction <sup>a</sup> | Parental Stress       | Child Stress          |
|-------------------------------------------------------------------------|--------------------------------------------------------------------------|-----------------------------------------------|-----------------------|---------------------------------------------|-----------------------|-----------------------|
|                                                                         | (Range 0-4)                                                              | (Range 0-2)                                   | (Range 0-12)          |                                             | (Range 0-40)          | (Range 0-40)          |
|                                                                         | Mean <i>p</i><br>(SD)                                                    | Mean <i>p</i><br>(SD)                         | Mean <i>p</i><br>(SD) | % <i>p</i>                                  | Mean <i>p</i><br>(SD) | Mean <i>p</i><br>(SD) |
| Prefer not to say<br>(0.9%)                                             | 3.17<br>(0.98)                                                           | 1.17<br>(0.75)                                | 4.17<br>(3.31)        | 16.67                                       | 21.83<br>(9.72)       | 16.33<br>(7.92)       |
| Education                                                               | 0.31                                                                     | 0.58                                          | 0.16                  | 0.24                                        | <0.001                | 0.24                  |
| High diploma or<br>less (12.0%)                                         | 2.57<br>(1.23)                                                           | 0.90<br>(0.72)                                | 6.11<br>(3.68)        | 45.24                                       | 19.63<br>(9.79)       | 15.27<br>(7.67)       |
| Some college<br>(33.1%)                                                 | 2.74<br>(1.21)                                                           | 1.02<br>(0.71)                                | 5.59<br>(3.39)        | 45.26                                       | 20.50<br>(8.74)       | 16.99<br>(7.35)       |
| Bachelor's<br>degree/postgraduate<br>work (32.4%)                       | 2.65<br>(1.13)                                                           | 0.98<br>(0.65)                                | 5.66<br>(3.42)        | 37.00                                       | 16.92<br>(8.96)       | 15.85<br>(7.14)       |
| Master's degree or<br>higher (22.5%)                                    | 2.55<br>(1.11)                                                           | 0.97<br>(0.63)                                | 6.33<br>(3.23)        | 38.61                                       | 16.68<br>(8.70)       | 15.85<br>(7.58)       |
| Gender identity                                                         | 0.52                                                                     | 0.55                                          | <0.001                | 0.57                                        | <0.001                | <0.01                 |
| Cisgender female<br>(61.9%)                                             | 2.69<br>(1.17)                                                           | 0.98<br>(0.68)                                | 5.48<br>(3.37)        | 42.17                                       | 20.13<br>(8.45)       | 16.88<br>(7.30)       |
| Cisgender male<br>(31.4%)                                               | 2.58<br>(1.11)                                                           | ref<br>(0.64)                                 | 6.40<br>(3.33)        | 37.73<br>ref                                | 14.82<br>(9.50)       | 14.51<br>(7.44)       |
| Other gender<br>identity (2.0%)                                         | 2.79<br>(1.25)                                                           | 1.14<br>(0.77)                                | 5.07<br>(3.97)        | 42.86                                       | 23.36<br>(6.43)       | 18.86<br>(5.95)       |
| Prefer not to say<br>(4.7%)                                             | 2.48<br>(1.42)                                                           | 1.09<br>(0.72)                                | 7.12<br>(3.46)        | 48.48                                       | 16.88<br>(7.90)       | 16.39<br>(7.00)       |
| Marital status                                                          | 0.17                                                                     | 0.85                                          | 0.37                  | 0.08                                        | <0.001                | <0.05                 |
| Divorced (7.8%)                                                         | 2.87<br>(1.14)                                                           | 0.98<br>(0.68)                                | 5.27<br>(3.52)        | 47.27                                       | 21.73<br>(8.66)       | 19.36<br>(6.86)       |
| Married (71.3%)                                                         | 2.61<br>(1.15)                                                           | 0.97<br>(0.68)                                | 5.89<br>(3.37)        | 38.40                                       | 17.38<br>(8.86)       | 15.83<br>(7.40)       |
| Not married, but in<br>a relationship and<br>living together<br>(10.1%) | 2.72<br>(1.20)                                                           | 1.08<br>(0.67)                                | 5.32<br>(3.53)        | 52.11                                       | 22.13<br>(9.01)       | 16.44<br>(7.75)       |

|                                                                   | Change in Children's Social and Recreational Activities |          | Change in Children's Relationships |          | School Resources |          | Fully Online Instruction <sup>a</sup> |          | Parental Stress |                  | Child Stress |          |
|-------------------------------------------------------------------|---------------------------------------------------------|----------|------------------------------------|----------|------------------|----------|---------------------------------------|----------|-----------------|------------------|--------------|----------|
|                                                                   | (Range 0-4)                                             |          | (Range 0-2)                        |          | (Range 0-12)     |          |                                       |          | (Range 0-40)    |                  | (Range 0-40) |          |
|                                                                   | Mean (SD)                                               | <i>p</i> | Mean (SD)                          | <i>p</i> | Mean (SD)        | <i>p</i> | %                                     | <i>p</i> | Mean (SD)       | <i>p</i>         | Mean (SD)    | <i>p</i> |
| Not married, but in a relationship and not living together (1.3%) | 2.22 (1.48)                                             |          | 0.89 (0.78)                        |          | 7.33 (3.87)      |          | 22.22                                 |          | 14.89 (11.82)   |                  | 13.33 (6.91) |          |
| Separated (2.4%)                                                  | 3.24 (0.83)                                             |          | 0.94 (0.56)                        |          | 6.24 (2.95)      |          | 41.18                                 |          | 18.65 (8.17)    |                  | 16.53 (6.87) |          |
| Single/never married (6.1%)                                       | 2.51 (1.24)                                             |          | 1.00 (0.69)                        |          | 6.37 (3.36)      |          | 53.49                                 |          | 20.37 (9.42)    |                  | 15.44 (6.98) |          |
| Widowed (0.9%)                                                    | 2.67 (1.21)                                             |          | 1.17 (0.41)                        |          | 6.33 (4.63)      |          | 16.67                                 |          | 16.50 (10.48)   |                  | 18.83 (5.64) |          |
| Age ( <i>M</i> =38.5; <i>SD</i> =7.6) <sup>b</sup>                | 0.04                                                    | 0.28     | -0.07                              | 0.07     | -0.00            | 0.93     | 39.03                                 | 0.14     | -0.19           | <b>&lt;0.001</b> | 0.01         | 0.70     |

*Note.* ref = reference group; Bolded *p*-values are statistically significant; <sup>a</sup>Percentage distributions of fully online instruction are provided instead of means for each sociodemographic category along with *p*-values of Chi-square tests examining group differences in fully online instruction. <sup>b</sup>Pearson correlation coefficients for age are provided instead of means.
